# Supplementary material for: Alicyclic polyimides with large band gaps exhibit superior high-temperature capacitive energy storage
Source: Royal Society of Chemistry journal article supplement (doi:10.1039/d2mh01511k), 2023-01-01
Supplement: d2mh01511k1.pdf [file d2mh01511k1.pdf]

## **Alicyclic Polyimides with Large Bandgap Exhibiting Superior High-Temperature Capacitive Energy Storage**

Jinhui Song,<sup>a</sup> Hongmei Qin,<sup>a</sup> Shiyu Qin,<sup>a</sup> Man Liu,<sup>a</sup> Shixian Zhang,<sup>a</sup> Junyu Chen,<sup>a</sup>  
Yang Zhang,<sup>a</sup> Shan Wang,<sup>\*a</sup> Qi Li,<sup>\*b</sup> Lijie Dong<sup>\*a</sup> and Chuanxi Xiong<sup>a</sup>

<sup>a</sup> School of Materials Science and Engineering, Wuhan University of Technology,  
Wuhan, 430070, China

<sup>b</sup> State Key Laboratory of Power System, Department of Electrical Engineering,  
Tsinghua University, Beijing 100084, China

\* Corresponding authors

Email: shanwang@whut.edu.cn; qili1020@tsinghua.edu.cn; dong@whut.edu.cn

## 1. DFT calculation

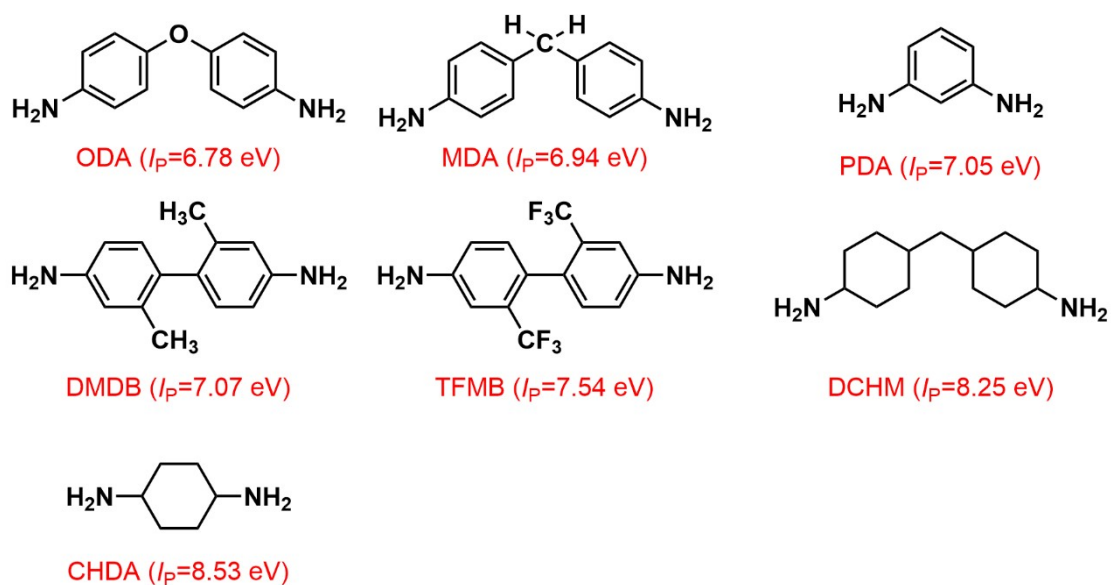

**Figure S1.** Structures of diamines and their ionization potentials ( $I_p$ ) calculated by the density functional theory at the B3LYP/6-311G(d,p) level.

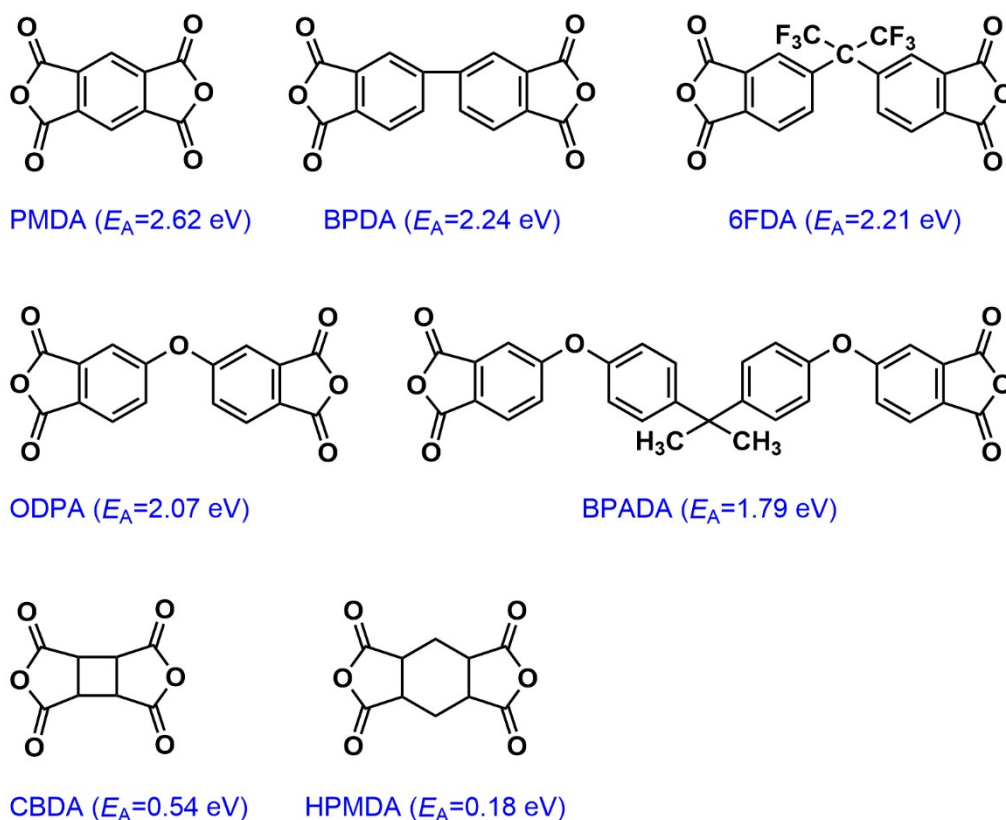

**Figure S2.** Structures of dianhydrides and their electron affinities ( $E_A$ ) calculated by the density functional theory at the B3LYP/6-311G(d,p) level.

PMDA/ODA **HOMO**

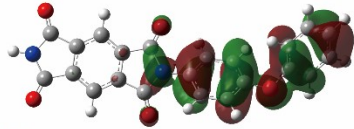

PMDA/MDA

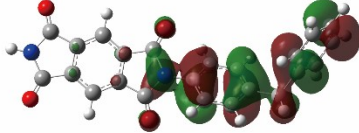

BPDA/ODA

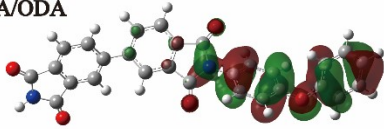

BPADA/PDA

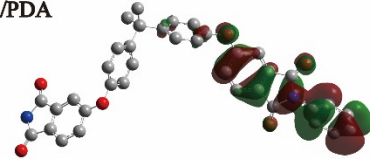

6FDA/TFMB

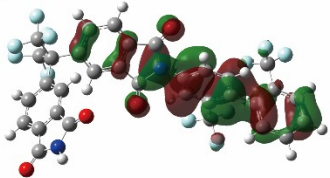

ODPA/TFMB

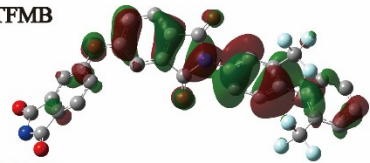

CBDA/DMDB

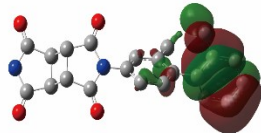

CBDA/TFMB

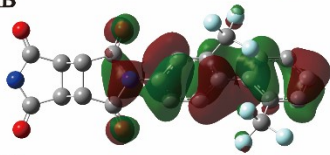

CBDA/DCHM

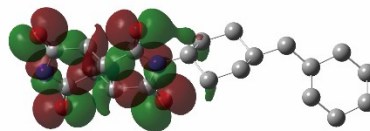

CBDA/CHDA

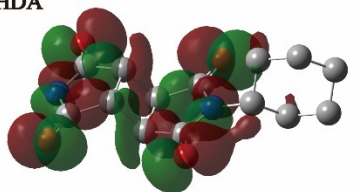

**LUMO**

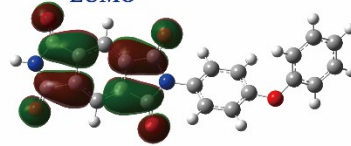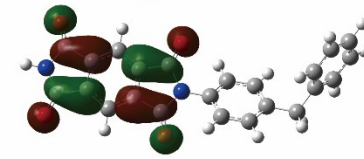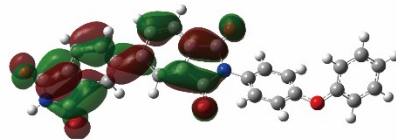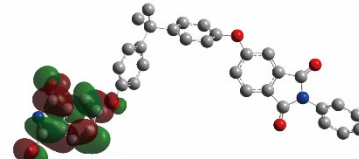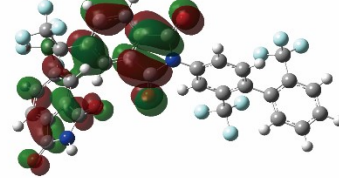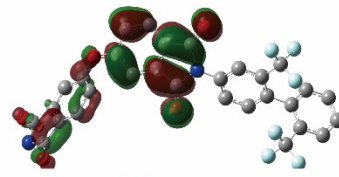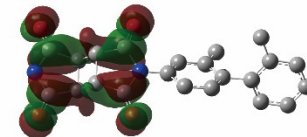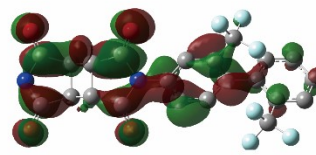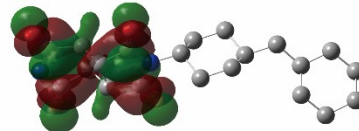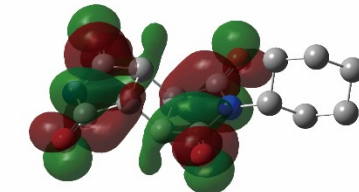

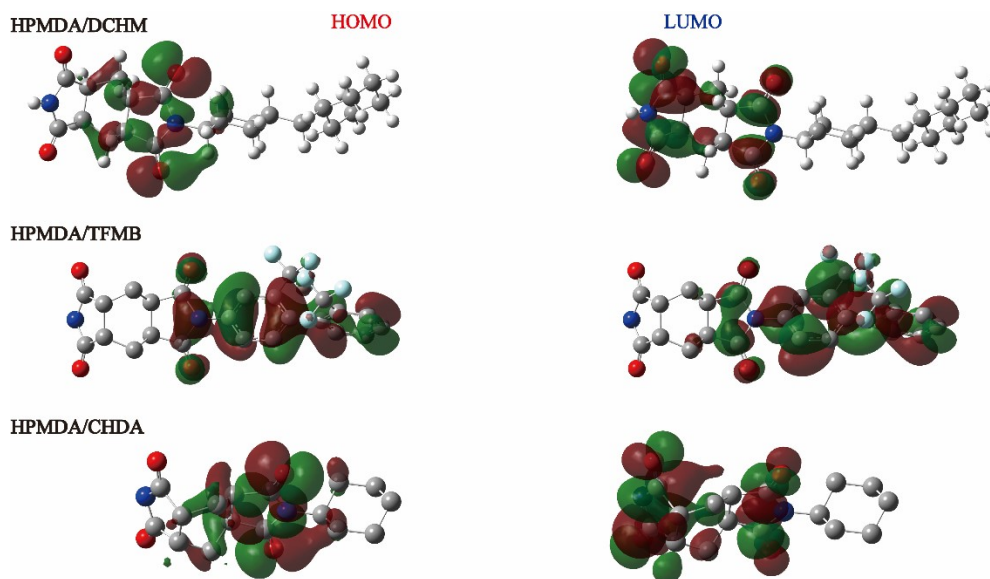

**Figure S3.** Spatial distributions of the HOMO (left-hand side) and LUMO (right-hand side) of PI model compounds.

**Table S1.** Summarization of the HOMO ( $E_{\text{HOMO}}$ ) and LUMO ( $E_{\text{LUMO}}$ ) energy levels of PI model compounds, and the ionization potential ( $I_{\text{p}}$ ) and electron affinity ( $E_{\text{A}}$ ) of the diamine and dianhydride monomers, respectively.

| PI model   | $E_{\text{HOMO}}/\text{eV}$ | $E_{\text{LUMO}}/\text{eV}$ | $I_{\text{p}}/\text{eV}$ | $E_{\text{A}}/\text{eV}$ |
|------------|-----------------------------|-----------------------------|--------------------------|--------------------------|
| PMDA/ODA   | -6.29                       | -3.48                       | 6.78                     | 2.62                     |
| PMDA/MDA   | -6.64                       | -3.42                       | 6.94                     | 2.62                     |
| BPDA/ODA   | -6.16                       | -2.95                       | 6.78                     | 2.24                     |
| ODPA/TFMB  | -6.96                       | -2.83                       | 7.54                     | 2.07                     |
| BPADA/PDA  | -6.52                       | -2.44                       | 7.05                     | 1.79                     |
| 6FDA/TFMB  | -7.08                       | -3.08                       | 7.54                     | 2.21                     |
| CBDA/DMDB  | -6.79                       | -1.45                       | 7.07                     | 0.54                     |
| CBDA/TFMB  | -7.29                       | -1.76                       | 7.54                     | 0.54                     |
| CBDA/DCHM  | -7.46                       | -1.46                       | 8.25                     | 0.54                     |
| CBDA/CHDA  | -7.48                       | -1.47                       | 8.53                     | 0.54                     |
| HPMDA/DCHM | -7.33                       | -1.16                       | 8.25                     | 0.18                     |
| HPMDA/TFMB | -7.17                       | -1.60                       | 7.54                     | 0.18                     |
| HPMDA/CHDA | -7.34                       | -1.16                       | 8.53                     | 0.18                     |

## 2. Inherent viscosity

The molecular weights of the CBDA/TFMB and CBDA/DCHM were indirectly characterized by measuring the inherent viscosity of their corresponding PAA solution, since they are insoluble in common solvents. The inherent viscosity of the as-prepared PAA solutions (0.5 g/dL) was measured by using a Ubbelohde viscometer at 30 °C and calculated as:

$$\eta_{\text{inh}} = \ln(t/t_0)/C$$

where  $t_0$  and  $t$  are the outflow time of the pure solvent and PAA solution with a concentration of 0.5 g/dL, respectively.<sup>1</sup>

**Table S2.** Inherent viscosity of various PAA solutions

| PAA type   | $\eta_{\text{inh}}$     | Film-forming properties |
|------------|-------------------------|-------------------------|
| CBDA/TFMB  | 2.02 dL g <sup>-1</sup> | Good                    |
| CBDA/DCHM  | 1.54 dL g <sup>-1</sup> | Good                    |
| CBDA/CHDA  | 0.36 dL g <sup>-1</sup> | Brittle                 |
| HPMDA/DCHM | 0.40 dL g <sup>-1</sup> | Brittle                 |
| HPMDA/TFMB | 0.40 dL g <sup>-1</sup> | Brittle                 |
| HPMDA/CHDA | 0.39 dL g <sup>-1</sup> | Brittle                 |

The inherent viscosities of the prepared CBDA/TFMB and CBDA/DCHM are larger than 1 dL g<sup>-1</sup>, indicating that flexible PI films can be successfully obtained according to previous literature.<sup>2</sup>

### 3. Mechanical properties

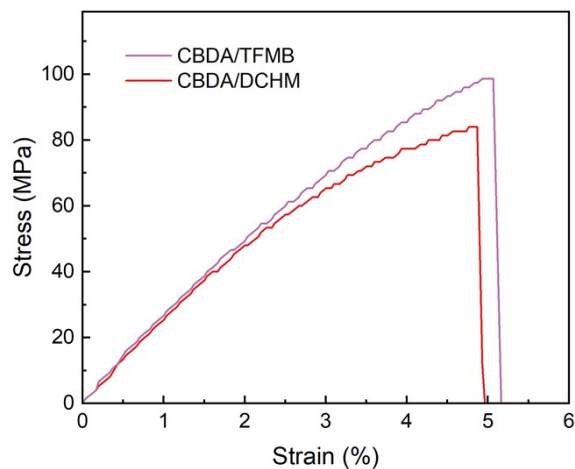

**Figure S4.** Stress-strain curves of CBDA/TFMB and CBDA/DCHM films.

### 4. FT-IR and UV-Vis spectroscopy

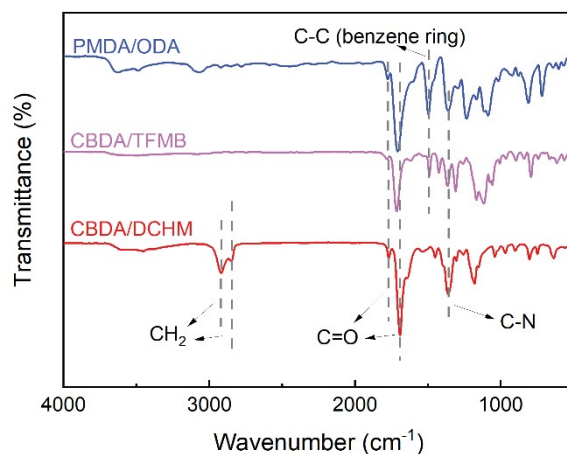

**Figure S5.** FT-IR spectra of PMDA/ODA, CBDA/TFMB, and CBDA/DCHM films.

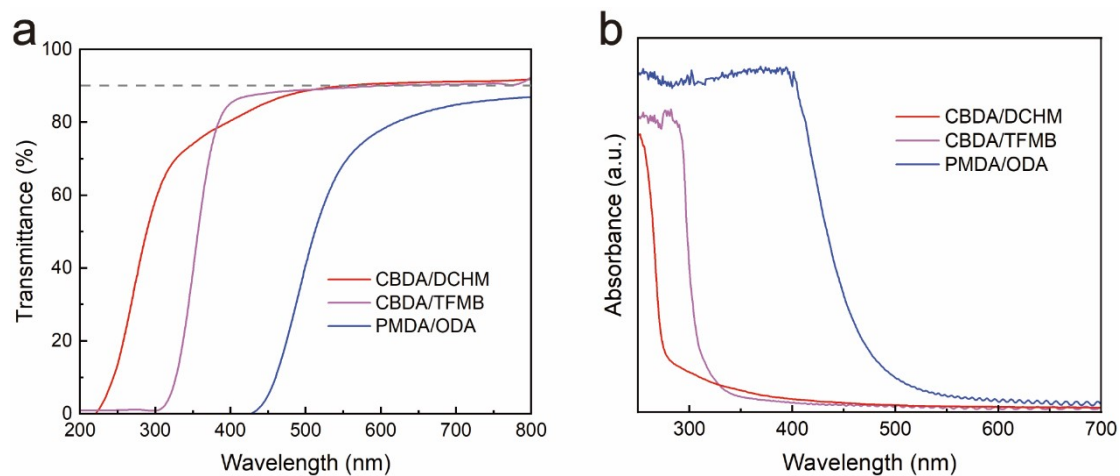

**Figure S6.** (a) UV-Vis transmission and (b) absorption spectra of PMDA/ODA,

CBDA/TFMB, and CBDA/DCHM films.

## 5. Thermal properties

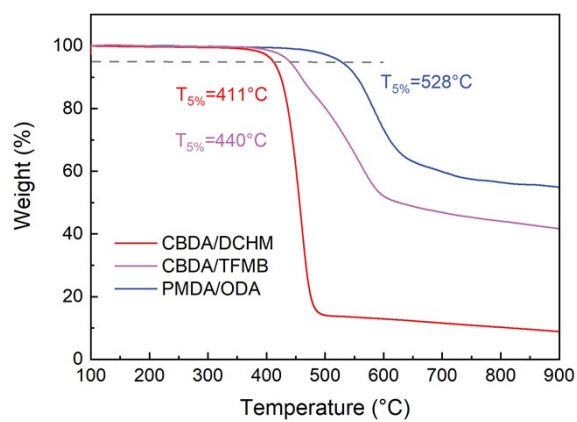

**Figure S7.** TGA curves of PMDA/ODA, CBDA/TFMB and CBDA/DCHM measured in a nitrogen atmosphere at a heating rate of 10 °C/min.

## 6. Electrical properties

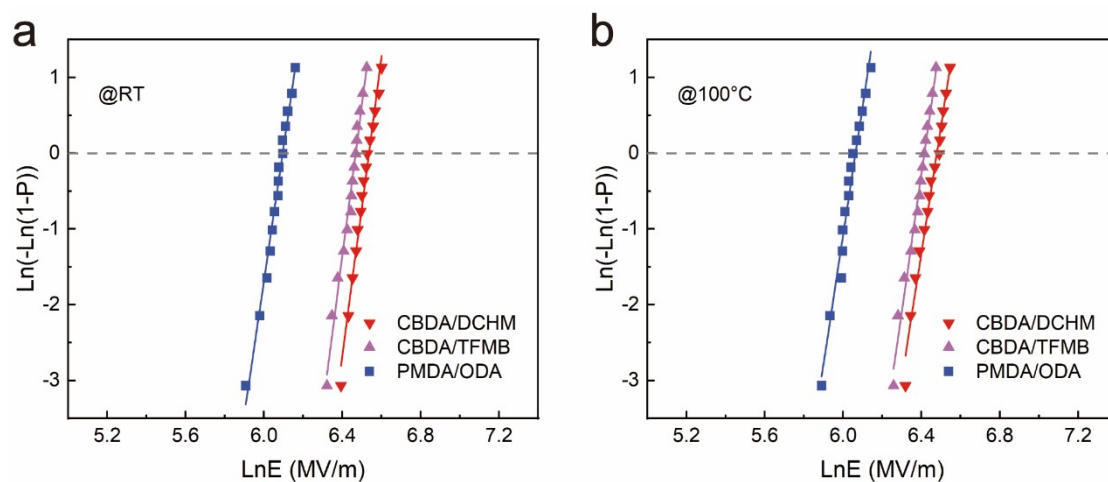

**Figure S8.** Weibull statistic of dielectric breakdown strength of CBDA/DCHM, CBDA/TFMB, and PMDA/ODA at (a) room temperature and (b) 100 °C.

**Table S3.** Weibull statistic parameters of CBDA/DCHM, CBDA/TFMB, and PMDA/ODA

| Temperature (°C) | Polyimide film | $E_b$ (MV/m) | $\beta$ |
|------------------|----------------|--------------|---------|
| RT               | PMDA/ODA       | 446          | 18      |
|                  | CBDA/TFMB      | 645          | 20      |
|                  | CBDA/DCHM      | 692          | 20      |
| 100 °C           | PMDA/ODA       | 428          | 17      |
|                  | CBDA/TFMB      | 608          | 18      |
|                  | CBDA/DCHM      | 652          | 17      |
| 150 °C           | PMDA/ODA       | 307          | 9       |
|                  | CBDA/TFMB      | 556          | 13      |
|                  | CBDA/DCHM      | 620          | 12      |
| 200 °C           | PMDA/ODA       | 270          | 6       |
|                  | CBDA/TFMB      | 497          | 9       |
|                  | CBDA/DCHM      | 605          | 10      |



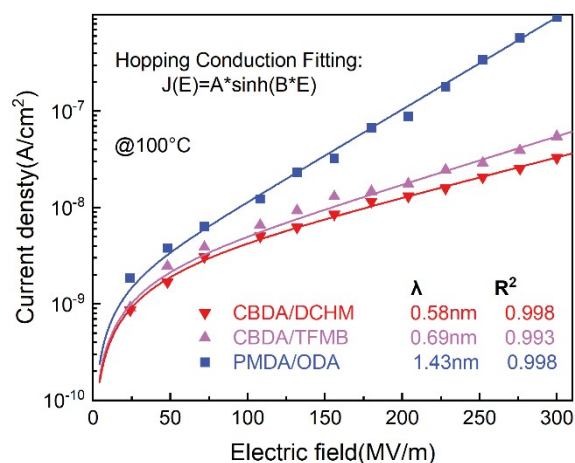

**Figure S9.** Leakage current density of CBDA/DCHM, CBDA/TFMB, and PMDA/ODA as a function of electric field at 100 °C. Solid lines are the fitting of the hopping conduction model.

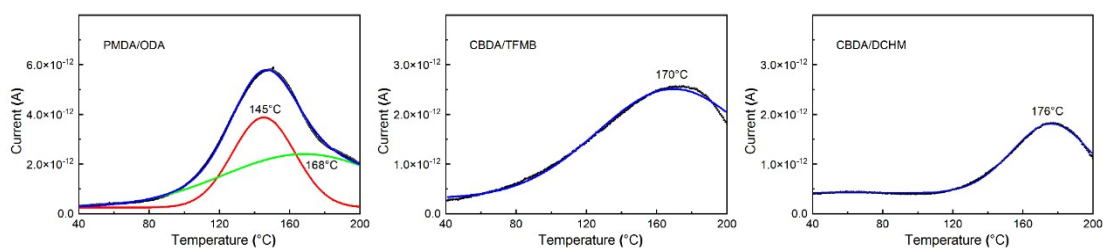

**Figure S10.** Gaussian fitting of the TSDC spectra of PMDA/ODA, CBDA/TFMB, and CBDA/DCHM.

**Table S4.** Charge trap parameters of PMDA/ODA, CBDA/TFMB, and CBDA/DCHM derived from the TSDC spectra

| Sample    | Temperature of Peak<br>(°C) | Activation energy<br>(eV) |
|-----------|-----------------------------|---------------------------|
| PMDA/ODA  | 145                         | 1.30                      |
|           | 168                         | 1.36                      |
| CBDA/TFMB | 170                         | 1.37                      |
| CBDA/DCHM | 176                         | 1.39                      |

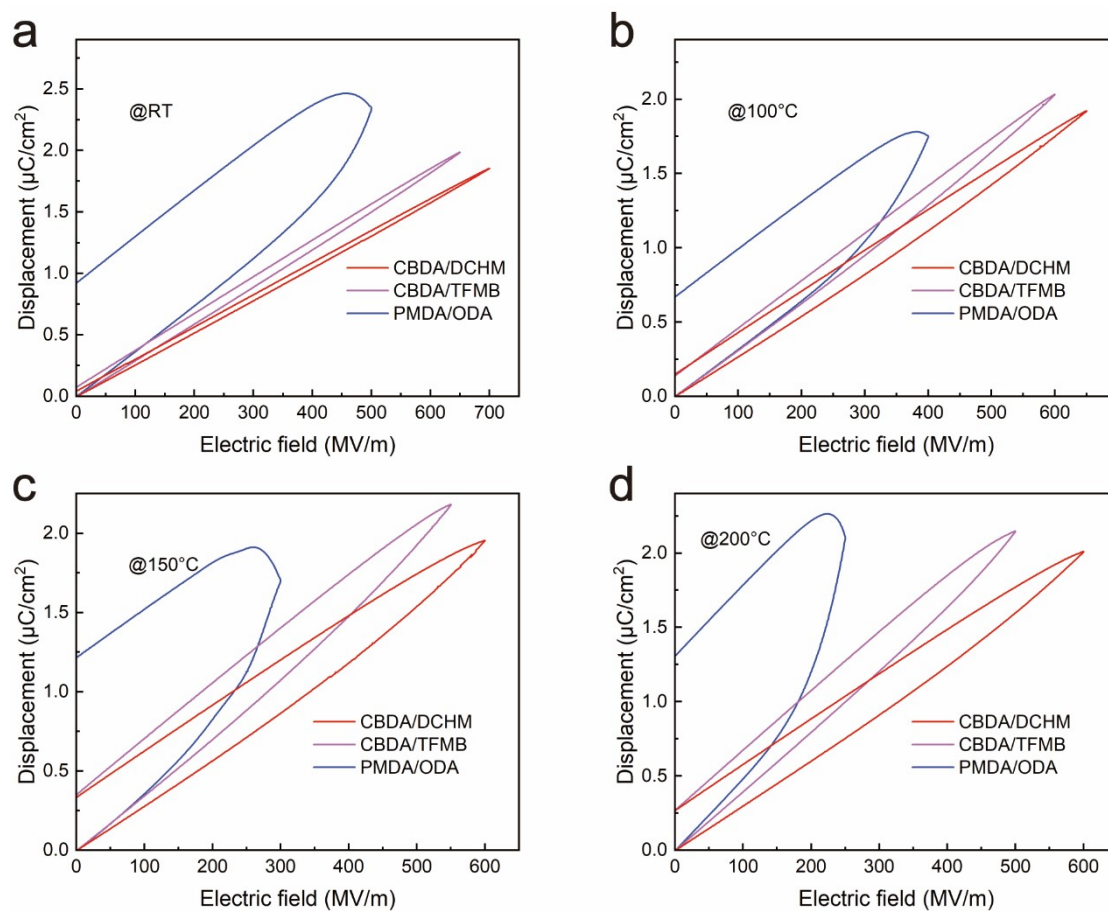

**Figure S11.** Electric displacement-electric field ( $D$ - $E$ ) loops of CBDA/DCHM, CBDA/TFMB, and PMDA/ODA measured at (a) room temperature, (b) 100 °C, (c) 150 °C, and (d) 200 °C, at their respective maximum field strength.

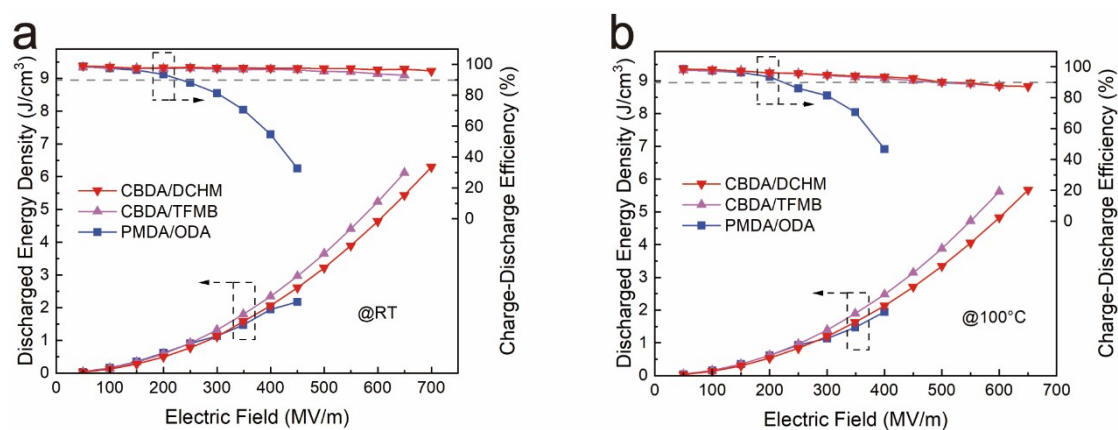

**Figure S12.** Discharged energy density and charge-discharge efficiency of CBDA/DCHM, CBDA/TFMB, and PMDA/ODA at (a) room temperature and (b) 100 °C.

## Reference

- 1 J. Yi, C. Liu, Y. Tian, K. Wang, X. Liu and L. Luo, *Polymer*, 2021, 218, 123488.
- 2 M. Hasegawa, M. Horiuchi, K. Kumakura and J. Koyama, *Polymer international*, 2014, 63, 486-500.
